# Supplementary material for: Basil Essential Oil: Composition, Antimicrobial Properties, and Microencapsulation to Produce Active Chitosan Films for Food Packaging
Source: MDPI journal article supplement (doi:10.3390/foods10010121), 2021-01-08
Supplement: s1 [file s1]

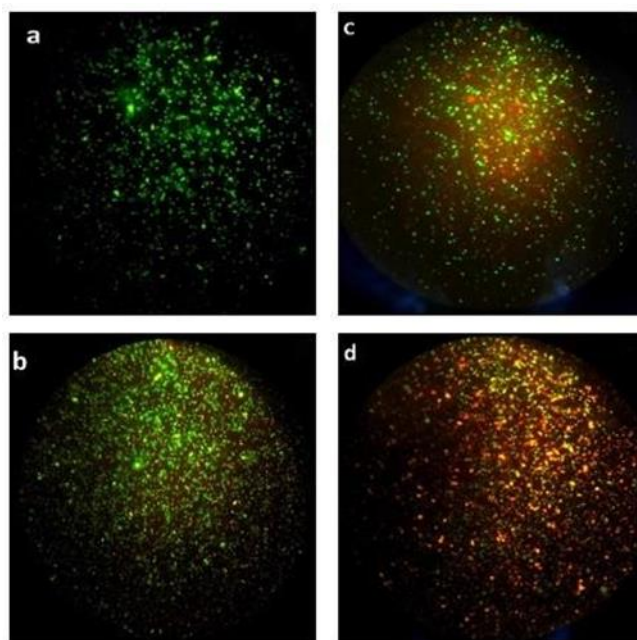

**Figure S1.** Fluorescence microscopy viability images (100 X magnification) of *E. coli* control culture (a) and in contact with basil essential oil microcapsules after 1 h (b), 5 h (c) and 24 h (d).

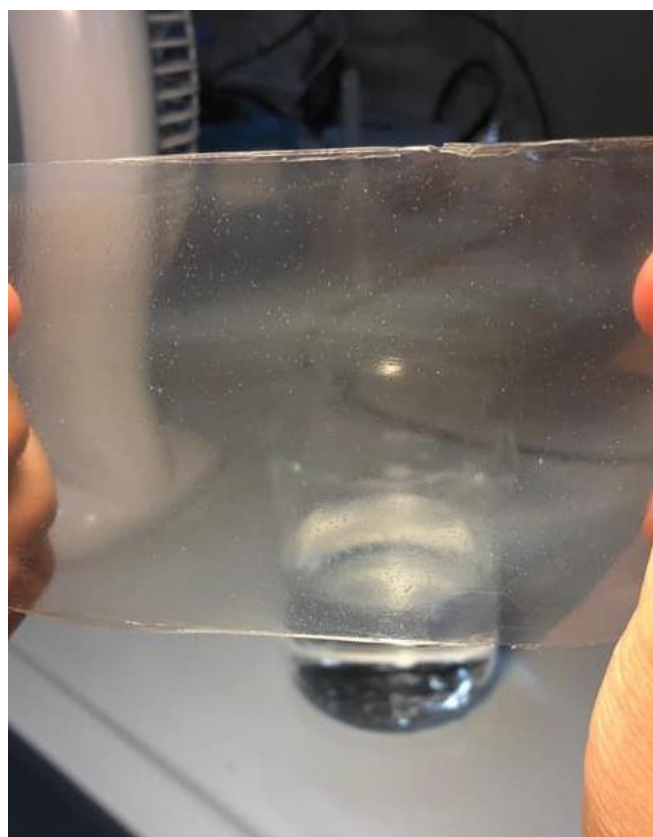

**Figure S2.** CH film containing microcapsules of BEO.
